# Supplementary material for: Association of MicroRNA-196a2 Variant with Response to Short-Acting β2-Agonist in COPD: An Egyptian Pilot Study
Source: PubMed Central journal article supplement (PMC4820109; doi:10.1371/journal.pone.0152834), 2016-04-04
Supplement: pone.0152834.s001.pdf [file pone.0152834.s001.pdf]

**S1 Table. Putative target genes of microRNA-196a2 using different databases <sup>a</sup>**

| n=749    |           |         |          |           |          |           |           |          |          |          |          |         | n=204    |              |          |          |
|----------|-----------|---------|----------|-----------|----------|-----------|-----------|----------|----------|----------|----------|---------|----------|--------------|----------|----------|
| miRNAmap |           |         |          |           |          |           |           |          |          |          |          |         | miRDB    |              |          |          |
| ABCC12   | BAP1      | CDAN1   | DLG3     | FLNA      | HOXA9    | LRP4      | MYO1E     | PHC2     | RBM16    | SLC9A6   | TMEM93   | WT1     | A2ML1    | GCFC2        | OTUD6B   | TMEM161B |
| ABCC2    | BASP1     | CDC73   | DLG5     | FLNB      | HOXB3    | LRRC17    | MYO1F     | PHF2     | RBM26    | SLC03A1  | TNFRSF21 | XPO4    | ABCB9    | GDNF         | P2RY1    | TMX1     |
| ABC2     | BAT3      | CDH23   | DLL1     | FLRT3     | HOXB6    | LRRC39    | MYO6      | PHF20    | RBM35A   | SMAD1    | TNP1     | XPO5    | ABI2     | GGA3         | PACRGL   | TOX3     |
| ABCE1    | BIRC6     | CDYL    | DMAP1    | FN1       | HOXB8    | LRRC49    | MYPN      | PHF3     | RCC2     | SMAD4    | TNPO2    | YLP1    | ACER2    | GGCX         | PANK2    | TRERF1   |
| ABCG4    | BMI1      | CENTD3  | DMGDH    | FOS       | HOXC8    | LRRC9     | NARG1L    | PHF6     | RDX      | SMARCA4  | TOX3     | ZC3H10  | AQP4     | GJB4         | PAR6B    | TRMT10A  |
| ABHD12   | BMX       | CHD1    | DMXL1    | FOXP4     | HOXD8    | LRSAM1    | NAV2      | PHF8     | RER1     | SMARCAD1 | TPM2     | ZC3H6   | ARFGEF1  | GPCPD1       | PBX1     | TRMT1L   |
| ABI3BP   | BNC2      | CHD5    | DNAH2    | FPGS      | HSD17B10 | LSS       | NCBP1     | PIGT     | REV3L    | SNAG1    | TPT1     | ZC3H7A  | ARHGAP28 | GPRASP1      | PBX3     | TSPAN12  |
| ACADVL   | BRD8      | CHD9    | DNM3     | FREM1     | HSP90AA1 | LTB4DH    | NCN       | PIK3CD   | RFX3     | SNAP91   | TRERF1   | ZC3HC1  | B3GNT7   | GRPEL2       | PDCL     | TSTD3    |
| ACBD3    | BRMS1L    | CHDH    | DNPEP    | FRMD5     | HSP90AB1 | MACF1     | NCOR1     | PIP5K1B  | RHOG     | SNCAIP   | TRHDE    | ZCCHC6  | BACH1    | GTDC1        | PDGFRA   | TTC26    |
| ACCN1    | BRPF1     | CHIA    | DOC2A    | FRRS1     | HSPA4L   | MADD      | NDST2     | PKD2L1   | RIC8B    | SNTB2    | TRIM16   | ZDHHC16 | BIRC6    | GTFA21       | PHF8     | UHRF2    |
| ACE      | BRSK2     | CHRNA7  | DOCK11   | FRY       | HSPE1    | MAEA      | NEDD1     | PKD2L2   | RIMS1    | SNX1     | TRIM42   | ZEB1    | BRAP     | GUF1         | PLD1     | VAX1     |
| ACLY     | BTBD11    | CHST1   | DOCK5    | GABARAP   | HSPH1    | MAMDC2    | NEDD4L    | PKNOX2   | RNF10    | SNX17    | TRIM59   | ZER1    | C18orf25 | HABP4        | PLN      | VSNL1    |
| ACSS2    | BZW1      | CHSY1   | DOLK     | GABARAPL2 | HTRA4    | MAN2A2    | NEK1      | PLA2R1   | RNF111   | SNX4     | TRIP10   | ZFAND5  | C9orf72  | HADH         | POLR3D   | WDR37    |
| ACTR1A   | C10orf137 | CKAP5   | DPH1     | GABRA2    | HUWE1    | MAOB      | NEO1      | PLAG1    | RNF12    | SORCS3   | TRNT1    | ZFP36L2 | CALD1    | HDX          | PPAPDC2  | YIPF6    |
| ACVR2A   | C10orf38  | CLGN    | DPP3     | GABRA5    | IBRDC3   | MAP3K15   | NEUROD1   | PLCB2    | RNF128   | SOX5     | TRPC3    | ZMYM3   | CALM1    | HMGA1        | PPP1R15B | YOD1     |
| ADAM17   | C12orf41  | CLINT1  | DPY19L4  | GALE      | IBTK     | MAP3K2    | NFE2L1    | PLCH1    | RNF145   | SPAG9    | TRPC4    | ZMYM5   | CASK     | HMGA2        | PRELID2  | ZCCHC3   |
| ADAMT5   | C12orf48  | CLIP1   | DST      | GATA6     | IDE      | MAP3K7IP2 | NFKBIA    | POLD1    | RNF19    | SPATA6   | TRPM3    | ZMYND10 | CBFA2T3  | HOOK1        | PRKG1    | ZCCHC9   |
| AGBL3    | C14orf103 | CLPB    | DTNA     | GBA2      | IDH1     | MAPK1     | NHLH2     | POLG     | RPS6KA4  | SPNS1    | TRPS1    | ZMYND11 | CCDC47   | HOXA5        | PRTG     | ZDHHC21  |
| AGPAT4   | C15orf29  | CLSPN   | DULLARD  | GCN1L1    | IGF2BP2  | MAPK10    | NIT2      | POMGNT1  | RPS6KB2  | SPSB3    | TSPAN3   | ZNF148  | CCNJ     | HOXA7        | PSMD11   | ZMYND11  |
| AKAP6    | C15orf44  | CNKSR2  | DUSP15   | GDPD2     | IKZF2    | MAPK13    | NOL6      | POP1     | RQCD1    | SPTBN2   | TTBK2    | ZNF207  | CD24     | HOXA9        | PTGR1    | ZNF268   |
| AKTIP    | C17orf84  | CNTNAP1 | DVL2     | GFPT2     | ILF3     | MAPK8IP3  | NONO      | POU1F1   | RTTN     | SPTLC1   | TTC1     | ZNF281  | CDKN1B   | HOXB6        | PTPRG    | ZNF385B  |
| ALDH6A1  | C1orf112  | COG4    | DYNC2L1  | GGPS1     | ILK      | MAPKAP1   | NOTCH1    | PPM1A    | RUFY1    | SSR2     | TLL9     | ZNF294  | CEP350   | HOXB7        | RANBP2   | ZNF473   |
| ALG9     | C1orf128  | COG8    | DYRK2    | GGTL3     | IMPDH1   | MAPRE2    | NPAS4     | PPP1R3A  | RUTBC1   | ST3GAL3  | TUBA4B   | ZNF609  | COL1A2   | HOXC8        | RASGRP1  | ZNF512   |
| AMACR    | C1orf32   | COL14A1 | DYRK3    | GIT1      | ING1     | MARCH6    | NPEPPS    | PPP2R5A  | RXFP2    | STAG1    | TUBAL3   | ZNF644  | COL24A1  | IGDC4        | RAVER2   | ZNF850   |
| ANKRD10  | C1orf34   | COL24A1 | DYSF     | GIT2      | IPO11    | MAST4     | NR2C1     | PPP2R5E  | SALL3    | STAG2    | TUSC2    | ZNF76   | COL3A1   | IGF2BP3      | RBM12B   |          |
| ANKRD28  | C2        | COL2A1  | DYX1C1   | GLE1L     | ITGB3BP  | MAT2A     | NR4A2     | PPP3CB   | SAMD8    | STAM     | TXNRD2   | ZNRF1   | CREBL2   | ING5         | RBM8A    |          |
| ANXA1    | C22orf28  | COL4A1  | EDIL3    | GLT8D2    | ITPR2    | MBD5      | NRG1      | PPT2     | SAPS2    | STAU1    | TYRO3    | ZNRF2   | DCAF15   | IQCH         | RBMS3    |          |
| AP1S2    | C3orf59   | COL5A2  | EFTUD1   | GNA5      | ITSN1    | MBD6      | NSL1      | PRDM11   | SAR1B    | STAU2    | UBAP2    | ZW10    | CCDC2    | IQCJ-SCHIP1  | RCC2     |          |
| AP3B1    | C4orf31   | COL9A1  | EGFL9    | GOLGA4    | JAG1     | MBNL2     | NTN4      | PRDM16   | SARDH    | STK4     | UBE2D3   | ZZZ3    | DENND6A  | KCNQ5        | RDX      |          |
| AP3D1    | C6orf125  | COPG    | EIF1AY   | GOLGA7    | KCNC2    | MCM4      | NUMA1     | PRKAG1   | SCOC     | STRAP    | UBL7     |         | DICER1   | KDM5A        | RET      |          |
| AP3M1    | C6orf134  | COPS3   | EIF3S10  | GPATC1    | KCNC4    | MDN1      | NUP160    | PRKCB1   | SDHA     | STRBP    | UBTF     |         | DIP2A    | KIAA1429     | RGL2     |          |
| APBB3    | C6orf165  | COPS6   | EIF4G1   | GPBP1L1   | KCNIP4   | ME1       | NUP35     | PRKG1    | SEC13    | SUMO1    | UCKL1    |         | DIS3     | KLHL4        | RICTOR   |          |
| ARAF     | C6orf166  | COP57B  | EIF4G3   | GPM6B     | KCNQ4    | MEA1      | ODZ1      | PRKG2    | SEC24A   | SYTL2    | UHRF2    |         | DNAJC10  | LARP4        | RIOK3    |          |
| ARF1     | C7orf11   | CPD     | ELAVL4   | GPR137B   | KCNQ5    | MELK      | OLFML2A   | PRKRIR   | SEC61A2  | TAC1     | UNC13B   |         | DNM3     | LCOR         | RLIM     |          |
| ARFGEF1  | C7orf42   | CPNE8   | ELMO1    | GPS2      | KCTD19   | MESDC1    | ORC5L     | PRLR     | SEC61B   | TAF1A    | UNC45A   |         | DOC2A    | LIN28B       | RNF10    |          |
| ARFIP1   | C9orf127  | CPSF1   | ELMO2    | GRIA1     | KCTD4    | MET       | OSBPL1    | PRPF31   | SEL1L2   | TAOK1    | USP2     |         | DYNC2L1  | LIX1L        | RNF5     |          |
| ARNTL    | C9orf52   | CREB3L1 | ENTPD5   | GRIN1     | KDEL2    | MGAT4A    | OTUD7A    | PRPF4B   | SEMA3A   | TBC1D10A | USP32    |         | EEA1     | LOC102724908 | RNMT     |          |
| ASB3     | CA10      | CS      | EP300    | GTF2A1    | KHDRBS1  | MKRN1     | PA2G4     | PRPF8    | SEMA6A   | TBC1D22B | USP47    |         | EEF2K    | LRIG2        | ROCK1    |          |
| ASH2L    | CA7       | CSNK2A2 | EPB41L2  | GTF3C2    | KIAA0528 | MLL5      | PAC52     | PRSS7    | SENP3    | TBL3     | UTRN     |         | ELAVL4   | LRIG3        | RPL35A   |          |
| ASTN1    | CACNA1A   | CSPP1   | EPHA7    | GTF3C3    | KIAA1244 | MLLT10    | PACFAH1B3 | PTPLA    | SENP6    | TBPL1    | VDAC1    |         | ELF4     | LRP4         | RPS27A   |          |
| ATG16L2  | CACNA2D2  | CSRP2BP | EPS15    | GTBP2     | KIAA1411 | MMP23B    | PAK1      | PTPRG    | SEPT7    | TBX15    | VEGFA    |         | ELMOD2   | LRRC17       | RSPO2    |          |
| ATG9A    | CACNB3    | CTNNA1  | ERG      | GUCY2C    | KIAA1539 | MOSPD1    | PAPPA     | PUM2     | SETD2    | TBX4     | VIM      |         | EPHA3    | LRRC4B       | SCCPDH   |          |
| ATP13A2  | CALB1     | CTNND2  | ESCO1    | GUF1      | KIAA1797 | MOV10     | PARP6     | PUNC     | SFRS10   | TCERG1   | VPS13A   |         | EPHA7    | MAP3K1       | SCYL2    |          |
| ATP13A4  | CALD1     | CTRC    | EYA1     | GYS2      | KIAA1967 | MPDZ      | PAX3      | PUS3     | SFRS11   | TCF7L2   | VPS13B   |         | ERI2     | MAP4K3       | SDCBP    |          |
| ATP6V0D1 | CALU      | CTTNBP2 | FAM108C1 | HACE1     | KIF1C    | MRC1      | PBX1      | QARS     | SFRS4    | TEX9     | VPS26A   |         | ERLIN2   | MAPK8        | SIRT5    |          |
| ATP6V1B1 | CAMK2G    | CUEDC2  | FAM110B  | HACL1     | KIF27    | MRC1L1    | PCBP4     | RAB21    | SGK      | TH1L     | VPS35    |         | EXOC5    | MBNL2        | SLC25A5  |          |
| ATP8A2   | CARD11    | CXorf45 | FAM13C1  | HADHA     | KIF5B    | MRPL33    | PCCB      | RAB2A    | SGPP1    | THBS4    | VPS37A   |         | EXOC8    | MGAT4A       | SLC35F4  |          |
| ATPBD1C  | CASC3     | DBC1    | FAM45A   | HAS3      | KLHL13   | MRPL39    | PCDH1     | RAB5A    | SLC12A6  | THSD4    | VPS52    |         | FAM104A  | MTRNR2L4     | SLC39A9  |          |
| ATRNL1   | CASK      | DBR1    | FAM46A   | HBP1      | KLHL29   | MRV1      | PCDH19    | RACGAP1  | SLC17A7  | THSD7A   | VSNL1    |         | FAM13C   | MYSM1        | SLC9A6   |          |
| ATXN2    | CAV1      | DCUN1D1 | FAM49B   | HDAC3     | KLHL6    | MSH4      | PCNXL2    | RAF1     | SLC20A2  | TIAF1    | WAC      |         | FAM154B  | NAP1L1       | SLC9B2   |          |
| ATXN2L   | CBX5      | DDX19B  | FASK     | HECTD1    | KPNA4    | MSI1      | PDCD10    | RALA     | SLC25A1  | TLE1     | WDR3     |         | FAM19A5  | NEDD4L       | SMC3     |          |
| ATXN7L2  | CCDC100   | DEF6    | FAT4     | HECTD3    | KRT83    | MTF1      | PDCD11    | RALBP1   | SLC25A13 | TLK1     | WDR42A   |         | FAS      | NOSTRIN      | SNAP91   |          |
| AXIN2    | CCDC109A  | DENND1B | FBN1     | HECW1     | LARP4    | MTF2      | PDE11A    | RANBP3   | SLC30A9  | TLN1     | WDR8     |         | FBXO47   | NR2C2        | SNX16    |          |
| B4GALT3  | CCDC19    | DENND4A | FBP2     | HERC4     | LARP6    | MTHFD1    | PDE6D     | RAP1B    | SLC35B1  | TM9SF2   | WDTC1    |         | FGD6     | NR6A1        | SNX24    |          |
| BAAT     | CCDC22    | DENND4C | FBXO39   | HIP2      | LATS1    | MYC       | PDHA1     | RARB     | SLC35D3  | TMCO2    | WHSC1L1  |         | FNIP1    | NRAS         | SPATA6   |          |
| BACH2    | CCDC47    | DEPDC1B | FBXW9    | HK1       | LCOR     | MYH14     | PDXDC1    | RARS2    | SLC4A7   | TMEM117  | WISP3    |         | FRMD4B   | NTN4         | SRRT     |          |
| BAI1     | CCDC53    | DGKH    | FES      | HMGCS1    | LHX2     | MYH15     | PEX5L     | RASA1    | SLC4A8   | TMEM165  | WNK3     |         | GABRA2   | ODF2L        | SULT2A1  |          |
| BAI2     | CCNI      | DHX29   | FGF14    | HNRPUL1   | LIN28B   | MYL6B     | PFKFB1    | RASGEF1A | SLC5A12  | TMEM168  | WNT2B    |         | GALC     | OPA1         | SUOX     |          |
| BAI3     | CCNJ      | DHX57   | FHL1     | HOOK3     | LMO7     | MYO16     | PGD       | RASGEF1B | SLC7A4   | TMEM39B  | WNT9B    |         | GAN      | OPA3         | SYT9     |          |
| BAIAP2   | CCNL1     | DICER1  | FHL2     | HOXA1     | LPHN3    | MYO1C     | PHACTR1   | RBBP7    | SLC7A7   | TMEM87A  | WSB1     |         | GATA6    | OR7D2        | TBPL1    |          |

| n=295      |         |             |                 |          | n=226      |           |         |          | n=108                      |                                |         | n=23          |
|------------|---------|-------------|-----------------|----------|------------|-----------|---------|----------|----------------------------|--------------------------------|---------|---------------|
| TargetsCan |         |             |                 |          | miRTarBase |           |         |          | Diana                      |                                |         | Diana in KEGG |
| AAK1       | CPM     | HDX         | NTN4            | SLC9A6   | ABT1       | FLNA      | MED13   | SAP18    | ACTR10 (ENSG00000131966)   | LARP4 (ENSG00000161813)        | ABCC8   |               |
| ABC9       | CREBL2  | HMG1        | OPCML           | SMAD6    | ACTB       | FOXJ3     | MPP2    | SAR1B    | ARFGF1 (ENSG00000066777)   | LIN28B (ENSG00000187772)       | ABL2    |               |
| ABL1       | CTDSP2  | HMG2        | OSMR            | SMARCC1  | AHSA1      | FOXO1     | MRPL35  | SBF1     | ARHGAP28 (ENSG00000088756) | LIX1L (ENSG00000152022)        | ACSL6   |               |
| ABL2       | CTPS    | HOOK1       | OTUD6B          | SMCR7L   | ANXA1      | FRS2      | MSL3    | SBNO1    | ATRNL1 (ENSG00000107518)   | LONP2 (ENSG00000102910)        | ACVR2B  |               |
| ACER2      | DCAF15  | HOXA5       | OTX1            | SMCR8    | ANXA7      | FXR2      | MTRF1L  | SCN11A   | AUH (ENSG00000148090)      | LONRF3 (ENSG00000175556)       | BIRC6   |               |
| ACSL6      | DCDC2   | HOXA7       | PACRGL          | SMURF1   | APP        | GGA3      | MYCBP2  | SH3GL3   | BCAT1 (ENSG00000060982)    | LRP1B (ENSG00000168702)        | CASK    |               |
| ACTR10     | DDX19A  | HOXA9       | PAPOLG          | SNTB2    | ARHGAP28   | GID8      | NAP1L4  | SKI      | BIRC6 (ENSG00000115760)    | LRP4 (ENSG00000134569)         | COL1A2  |               |
| ADCY9      | DDX19B  | HOXB6       | PARD6B          | SNX16    | ATG16L1    | GLMN      | ND4     | SLC10A7  | C10RF25 (ENSG00000121486)  | MAP3K1 (ENSG00000095015)       | COL3A1  |               |
| AFF2       | DIP2A   | HOXB7       | PARP8           | SOC34    | ATG9A      | GLTP      | ND4L    | SLC20A1  | CASK (ENSG00000147044)     | MBNL2 (ENSG00000139793)        | DIAPH2  |               |
| APBA1      | DIRC2   | HOXB8       | PAX7            | SOX11    | ATP1A1     | GLUL      | ND5     | SLC25A17 | CCDC39 (ENSG00000145075)   | MRS2 (ENSG00000124532)         | EPB41L2 |               |
| AQP4       | DLGAP2  | HOXC8       | PBX1            | SOX12    | ATP6       | GMFB      | NDPIP1  | SLC30A6  | CCDC47 (ENSG00000108588)   | MSH2 (ENSG00000095002)         | FLNB    |               |
| ARFIP2     | DNAJC27 | HP1BP3      | PBX3            | SPRED1   | ATP6V1B2   | GOT2      | NHLRC3  | SLC6A8   | CCNJ (ENSG00000107443)     | NAALADL2 (ENSG00000177694)     | GABRA2  |               |
| ARHGAP20   | DOCK3   | ICOS        | PCDH19          | SSR1     | BACH1      | GRIK4     | NKX6-1  | SMARCA1  | CDYL (ENSG00000153046)     | NBPF1,NBPF11 (ENSG00000203836) | IDE     |               |
| ARHGAP28   | DOK6    | IGDCC4      | PCYT1B          | STEAP2   | BCL11A     | GSTK1     | NOTCH2  | SMC3     | CLEC2B (ENSG00000110852)   | NR2C2 (ENSG00000177463)        | MAPK8   |               |
| ARHGFE15   | E2F7    | IGF1        | PDGFR1          | SUDS3    | BCORL1     | HAND1     | NR2F6   | SMCR7L   | COL14A1 (ENSG00000187955)  | NR6A1 (ENSG00000148200)        | NME4    |               |
| ARHGFE38   | EBF1    | IGF2BP1     | PEG10           | SYNCRIP  | BCS1L      | HAUS6     | NR4A1   | SNRPD1   | COL1A2 (ENSG00000164692)   | NRAS (ENSG00000213281)         | NTN4    |               |
| ARH84      | EEA1    | IGF2BP3     | PHF20           | SYT9     | BIN3       | HIST1H2BB | NRBP1   | SPATA2   | COL3A1 (ENSG00000168542)   | OPCML (ENSG00000183715)        | PCYT1B  |               |
| AZ12       | EEF2K   | IGFBP3      | PHOSPHO2-KLHL23 | TAOK1    | BMP4       | HIST2H4B  | NRDE2   | SPEN     | CREBL2 (ENSG00000111269)   | OTUD6B (ENSG00000155100)       | PDGFRA  |               |
| B3GNT7     | EIF2S2  | IMPAD1      | PLDN            | TEAD3    | BRMS1L     | HMG1      | NRXN1   | SPRR2C   | DAZ1 (ENSG00000188120)     | PABPC1L2A (ENSG00000186288)    | PLOD1   |               |
| BACH1      | ELF4    | ING5        | PLEKHA8         | TGFB3    | BUB1       | HMG2      | NUP50   | SPRYD4   | DAZ2 (ENSG00000205944)     | PACRGL (ENSG00000163138)       | RBPJ    |               |
| BCAT1      | ELK4    | IQGJ-SCHIP1 | POLR3D          | TMEM143  | C11orf57   | HMOX1     | OAT     | SRP9     | DAZ3 (ENSG00000187191)     | PHF20 (ENSG00000025293)        | ROCK1   |               |
| BCL11A     | EPC2    | KCNE3       | PPAPDC2         | TMEM194A | C12orf4    | HOXA5     | OGFRL1  | SRRT     | DAZ4 (ENSG00000205916)     | PLN (ENSG00000198523)          | XYLT2   |               |
| BEND4      | EPHA3   | KCNJ2       | PPP1R15B        | TMOD2    | C19orf55   | HOXA7     | PALLD   | STK40    | DCDC2 (ENSG00000146038)    | POLR3D (ENSG00000168495)       |         |               |
| BIRC6      | EPHA7   | KCNQ5       | PPP1R16B        | TMX1     | C9orf41    | HOXB7     | PATL1   | SYT9     | DDX19B (ENSG00000157349)   | PRELID2 (ENSG00000186314)      |         |               |
| BNC2       | EPS15   | KCTD21      | PPP6R2          | TOX3     | CANX       | HOXB8     | PCGF3   | SYVN1    | ENSG00000132017            | PTPRG (ENSG00000144724)        |         |               |
| C11orf57   | ERG     | KDM5A       | PRTG            | TRANK1   | CASP3      | HOXC8     | PDCD4   | TAB2     | ENSG00000143674            | RASGRP1 (ENSG00000172575)      |         |               |
| C11orf84   | ERLIN2  | KIAA1274    | PRUNE2          | TRERF1   | CCDC47     | HOXD8     | PDE6D   | TAF15    | ENSG00000189238            | RASSF3 (ENSG00000153179)       |         |               |
| C14orf147  | EXOC5   | KLHDC8B     | PTPRG           | TSC1     | CCND1      | HUWE1     | PEX13   | TIMM23   | ERG (ENSG00000157554)      | RAVER2 (ENSG00000162437)       |         |               |
| C15orf29   | EXOC8   | KLHL23      | RAD23B          | TSPAN12  | CCND2      | IFNGR1    | PGAM1   | TMEM135  | ER12 (ENSG00000196678)     | RBM12B (ENSG00000183808)       |         |               |
| C1GALT1    | EYA4    | LARP4       | RALBP1          | TSPAN18  | CCNE2      | IGDCC4    | PHC3    | TMEM161B | EXOC5 (ENSG00000070367)    | RCC2 (ENSG00000179051)         |         |               |
| C20orf112  | FAM102B | LOR         | RANBP10         | TTL      | CCNT2      | IGF1R     | PNP     | TMEM194A | EXOC8 (ENSG00000116903)    | RGPMTD2 (ENSG00000145331)      |         |               |
| C20orf160  | FAM104A | LCORL       | RANBP2          | UBE2G2   | CDKN1B     | IGF2BP1   | POLR2D  | TMEM2    | FRMD5 (ENSG00000171877)    | RG56 (ENSG00000182732)         |         |               |
| C4orf32    | FAM110B | LGALS8      | RAP1GAP2        | UHRF2    | CEP120     | IGF2BP3   | POTEG   | TMX2     | GABRA2 (ENSG00000151834)   | RNF10 (ENSG00000022840)        |         |               |
| C6orf168   | FAM127A | LIN28A      | RAPGEF5         | USP15    | CKAP2L     | IKBKB     | PROSER1 | TP53RK   | GALC (ENSG00000054983)     | RSPO2 (ENSG00000147655)        |         |               |
| C9orf5     | FAM127B | LIN28B      | RASGRP1         | USP31    | CNOT11     | IPO5      | PRPF8   | TRA2B    | GAN (ENSG00000127688)      | SLC35D2 (ENSG00000130958)      |         |               |
| CALM1      | FAM127C | LOR         | RASSF3          | VSNL1    | COP3       | ITGAV     | PRUNE2  | TRAP1    | GATA6 (ENSG00000141448)    | SLC9A2 (ENSG00000115616)       |         |               |
| CALM3      | FAM169A | LRI2        | RAVER2          | WDR37    | COX3       | KATNAL1   | PSMC3   | TRAPPC9  | GDF3 (ENSG00000184344)     | SLC9A6 (ENSG00000198689)       |         |               |
| CASK       | FAM178A | LRI3        | RCC2            | WIPF1    | CPD        | KCTD1     | PSMD8   | TRPC3    | HAND1 (ENSG00000113196)    | SNX13 (ENSG00000071189)        |         |               |
| CBFA2T3    | FAM19A5 | LRP1B       | RGL2            | YIPF6    | CPEB3      | KIAA1804  | RAB21   | TSKU     | HDAC9 (ENSG00000048052)    | SNX24 (ENSG00000064652)        |         |               |
| CCDC47     | FAM55C  | LRRC4B      | RG56            | YOD1     | DFFA       | KIF18B    | RAB31   | TSPAN12  | HMG1 (ENSG00000137309)     | SORCS1 (ENSG00000108018)       |         |               |
| CCNJ       | FBXO45  | LRRTM3      | RICTOR          | ZBTB39   | DIEXF      | KLHL7     | RAB7L1  | TUBA1B   | HMG2 (ENSG00000149948)     | SSR1 (ENSG00000124783)         |         |               |
| CDC25A     | FGF14   | LTN1        | RIOK3           | ZCCHC3   | DNTTIP2    | KMT2C     | RAD9A   | TUBB     | HOXA5 (ENSG00000106004)    | SULT2A1 (ENSG00000105398)      |         |               |
| CDC34      | FLRT1   | MAGT1       | RNF5            | ZDHHC21  | DYRK2      | KPNA5     | RALGPS2 | U2AF2    | HOXA7 (ENSG00000122592)    | TOX3 (ENSG00000103460)         |         |               |
| CDC73      | FNIP1   | MAP3K1      | RPGRIP1L        | ZMYND11  | ECHDC1     | KRT5      | RANBP9  | UBE2C    | HOXA9 (ENSG00000078399)    | TRERF1 (ENSG00000124496)       |         |               |
| CDKN1B     | FOXO1   | MAP4K3      | RSPO2           | ZNF148   | EEF2       | LBR       | RASSF7  | UBE2Z    | HOXB6 (ENSG00000108511)    | TRPC3 (ENSG00000138741)        |         |               |
| CDV3       | FOX2    | MARS2       | RFXP2           | ZNF200   | EIF2B4     | LGR4      | RBMX    | UQCRC2   | HOXB7 (ENSG00000120087)    | TXNDC6 (ENSG00000181322)       |         |               |
| CDYL       | GALC    | MBNL2       | SAP30L          | ZNF248   | EIF2S3     | LIN28B    | RDH10   | USP19    | HOXC8 (ENSG00000037965)    | UGT2A1 (ENSG00000173610)       |         |               |
| CECR6      | GAN     | MGAT4A      | SCHIP1          | ZNF354A  | ENAH       | LLGL1     | RDH11   | USP24    | IGF2BP1 (ENSG00000159217)  | VSNL1 (ENSG00000163032)        |         |               |
| CELF2      | GAS7    | MRS2        | SCRT1           | ZNF507   | EPHA7      | LRP2      | REEP2   | VCL      | IGF2BP3 (ENSG00000136231)  | WDR78 (ENSG00000152763)        |         |               |
| CEP350     | GATA6   | MTMR3       | SCRT2           | ZNF512   | ESPL1      | LRRC41    | RFC2    | VCP      | ING5 (ENSG00000168395)     | XAF1 (ENSG00000132530)         |         |               |
| CHR        | GCNT4   | NAP1L1      | SEMA3A          | ZNF516   | ETV3       | LSM14A    | RFX5    | VDAC2    | KCNJ2 (ENSG00000123700)    | ZDHHC21 (ENSG00000175893)      |         |               |
| CLCN5      | GLG1    | NC51        | SERP1           | ZNF652   | EWSR1      | LSM3      | RPS2    | VDAC3    | KCNQ5 (ENSG00000185760)    | ZMYND11 (ENSG00000151711)      |         |               |
| CNTRL      | GLTP    | NEDD4L      | SETD8           | ZNF689   | FAM104A    | LYRM2     | RPUSD2  | ZBTB24   | KLHL23 (ENSG00000213160)   | ZNF24 (ENSG00000172466)        |         |               |
| COL14A1    | GPCPD1  | NEURL1B     | SFMBT1          | ZNF710   | FAM127A    | MAP4      | RUFY2   | ZBTB6    | KLHL4 (ENSG00000102271)    |                                |         |               |
| COL1A1     | GPR156  | NHS         | SLC25A22        | ZNF81    | FKTN       | MED12     | S100A9  | ZCCHC11  | KLRB1 (ENSG00000111796)    |                                |         |               |
| COL1A2     | GRPEL2  | NME4        | SLC2A12         |          |            |           |         | ZFP64    |                            |                                |         |               |
| COL24A1    | GSPT1   | NR2C2       | SLC30A6         |          |            |           |         | ZNF354B  |                            |                                |         |               |
| COL3A1     | GYG2    | NRAS        | SLC31A1         |          |            |           |         | ZNF398   |                            |                                |         |               |
| CORIN      | HABP4   | NRK         | SLC35D2         |          |            |           |         | ZNF529   |                            |                                |         |               |
| CPD        | HAND1   | NRXN1       | SLC8A2          |          |            |           |         | ZNF581   |                            |                                |         |               |

<sup>a</sup> Yellow shaded cells are genes involved in COPD pathogenesis [14, 40 – 42].
