# Supplementary material for: Association of MicroRNA-196a2 Variant with Response to Short-Acting β2-Agonist in COPD: An Egyptian Pilot Study
Source: PubMed Central journal article supplement (PMC4820109; doi:10.1371/journal.pone.0152834), 2016-04-04
Supplement: pone.0152834.s002.pdf [file pone.0152834.s002.pdf]

**S2 Table. Functional annotation of putative microRNA-196a2 target genes in KEGG pathways**

| KEGG Pathway                                                     | Gene Name                                  | Found Genes | -ln(p-value) | Ensembl Gene ID                                                                                      | KEGG Pathway ID |
|------------------------------------------------------------------|--------------------------------------------|-------------|--------------|------------------------------------------------------------------------------------------------------|-----------------|
| <a href="#">Focal adhesion</a>                                   | MAPK8, PDGFRA, FLNB, ROCK1, COL3A1, COL1A2 | 6           | 12.14        | ENSG00000107643, ENSG00000134853, ENSG00000136068, ENSG00000067900, ENSG00000168542, ENSG00000164692 | hsa04510        |
| <a href="#">Type II diabetes mellitus</a>                        | MAPK8, ABCC8                               | 2           | 5.24         | ENSG00000107643, ENSG0000006071                                                                      | hsa04930        |
| <a href="#">Adipocytokine signaling pathway</a>                  | MAPK8, ACSL6                               | 2           | 2.7          | ENSG00000107643, ENSG00000164398                                                                     | hsa04920        |
| <a href="#">ECM-receptor interaction</a>                         | COL3A1, COL1A2                             | 2           | 2.27         | ENSG00000168542, ENSG00000164692                                                                     | hsa04512        |
| <a href="#">Colorectal cancer</a>                                | MAPK8, PDGFRA                              | 2           | 2.09         | ENSG00000107643, ENSG00000134853                                                                     | hsa05210        |
| <a href="#">ErbB signaling pathway</a>                           | MAPK8, ABL2                                | 2           | 2.02         | ENSG00000107643, ENSG00000143322                                                                     | hsa04012        |
| <a href="#">TGF-beta signaling pathway</a>                       | ROCK1, ACVR2B                              | 2           | 1.96         | ENSG00000067900, ENSG00000114739                                                                     | hsa04350        |
| <a href="#">Regulation of actin cytoskeleton</a>                 | PDGFRA, ROCK1, DIAPH2                      | 3           | 1.77         | ENSG00000134853, ENSG00000067900, ENSG00000147202                                                    | hsa04810        |
| <a href="#">Aminophosphonate metabolism</a>                      | PCYT1B                                     | 1           | 1.69         | ENSG00000102230                                                                                      | hsa00440        |
| <a href="#">Chondroitin sulfate biosynthesis</a>                 | XYLT2                                      | 1           | 1.29         | ENSG00000015532                                                                                      | hsa00532        |
| <a href="#">MAPK signaling pathway</a>                           | MAPK8, PDGFRA, FLNB                        | 3           | 1.22         | ENSG00000107643, ENSG00000134853, ENSG00000136068                                                    | hsa04010        |
| <a href="#">Axon guidance</a>                                    | NTN4, ROCK1                                | 2           | 1.22         | ENSG00000074527, ENSG00000067900                                                                     | hsa04360        |
| <a href="#">Tight junction</a>                                   | EPB41L2, CASK                              | 2           | 1.06         | ENSG00000079819, ENSG00000147044                                                                     | hsa04530        |
| <a href="#">Cell Communication</a>                               | COL3A1, COL1A2                             | 2           | 1.03         | ENSG00000168542, ENSG00000164692                                                                     | hsa01430        |
| <a href="#">Alzheimer's disease</a>                              | IDE                                        | 1           | 1.02         | ENSG00000119912                                                                                      | hsa05010        |
| <a href="#">Wnt signaling pathway</a>                            | MAPK8, ROCK1                               | 2           | 0.9          | ENSG00000107643, ENSG00000067900                                                                     | hsa04310        |
| <a href="#">Lysine degradation</a>                               | PLOD1                                      | 1           | 0.64         | ENSG00000083444                                                                                      | hsa00310        |
| <a href="#">Notch signaling pathway</a>                          | RBPJ                                       | 1           | 0.59         | ENSG00000168214                                                                                      | hsa04330        |
| <a href="#">ABC transporters - General</a>                       | ABCC8                                      | 1           | 0.55         | ENSG0000006071                                                                                       | hsa02010        |
| <a href="#">Fatty acid metabolism</a>                            | ACSL6                                      | 1           | 0.49         | ENSG00000164398                                                                                      | hsa00071        |
| <a href="#">Pathogenic Escherichia coli infection - EHEC</a>     | ROCK1                                      | 1           | 0.4          | ENSG00000067900                                                                                      | hsa05130        |
| <a href="#">Pathogenic Escherichia coli infection - EPEC</a>     | ROCK1                                      | 1           | 0.4          | ENSG00000067900                                                                                      | hsa05131        |
| <a href="#">Calcium signaling pathway</a>                        | PDGFRA                                     | 1           | 0.38         | ENSG00000134853                                                                                      | hsa04020        |
| <a href="#">Purine metabolism</a>                                | NME4                                       | 1           | 0.26         | ENSG00000103200                                                                                      | hsa00230        |
| <a href="#">Insulin signaling pathway</a>                        | MAPK8                                      | 1           | 0.25         | ENSG00000107643                                                                                      | hsa04910        |
| <a href="#">Glioma</a>                                           | PDGFRA                                     | 1           | 0.23         | ENSG00000134853                                                                                      | hsa05214        |
| <a href="#">Epithelial cell signaling in Helicobacter pylori</a> | MAPK8                                      | 1           | 0.21         | ENSG00000107643                                                                                      | hsa05120        |
| <a href="#">Ubiquitin mediated proteolysis</a>                   | BIRC6                                      | 1           | 0.2          | ENSG00000115760                                                                                      | hsa04120        |
| <a href="#">Glycerophospholipid metabolism</a>                   | PCYT1B                                     | 1           | 0.19         | ENSG00000102230                                                                                      | hsa00564        |
| <a href="#">PPAR signaling pathway</a>                           | ACSL6                                      | 1           | 0.17         | ENSG00000164398                                                                                      | hsa03320        |
| <a href="#">Glycan structures - biosynthesis 1</a>               | XYLT2                                      | 1           | 0.15         | ENSG00000015532                                                                                      | hsa01030        |
| <a href="#">Melanoma</a>                                         | PDGFRA                                     | 1           | 0.14         | ENSG00000134853                                                                                      | hsa05218        |
| <a href="#">Pancreatic cancer</a>                                | MAPK8                                      | 1           | 0.14         | ENSG00000107643                                                                                      | hsa05212        |
| <a href="#">Fc epsilon RI signaling pathway</a>                  | MAPK8                                      | 1           | 0.12         | ENSG00000107643                                                                                      | hsa04664        |
| <a href="#">Neuroactive ligand-receptor interaction</a>          | GABRA2                                     | 1           | 0.11         | ENSG00000151834                                                                                      | hsa04080        |
| <a href="#">Cytokine-cytokine receptor interaction</a>           | PDGFRA, ACVR2B                             | 2           | 0.11         | ENSG00000134853, ENSG00000114739                                                                     | hsa04060        |
| <a href="#">Leukocyte transendothelial migration</a>             | ROCK1                                      | 1           | 0.1          | ENSG00000067900                                                                                      | hsa04670        |
| <a href="#">Pyrimidine metabolism</a>                            | NME4                                       | 1           | 0.05         | ENSG00000103200                                                                                      | hsa00240        |
| <a href="#">Toll-like receptor signaling pathway</a>             | MAPK8                                      | 1           | 0.05         | ENSG00000107643                                                                                      | hsa04620        |
| <a href="#">Prostate cancer</a>                                  | PDGFRA                                     | 1           | 0.02         | ENSG00000134853                                                                                      | hsa05215        |
| <a href="#">GnRH signaling pathway</a>                           | MAPK8                                      | 1           | 0.01         | ENSG00000107643                                                                                      | hsa04912        |
| <a href="#">Gap junction</a>                                     | PDGFRA                                     | 1           | 0            | ENSG00000134853                                                                                      | hsa04540        |
