# Supplementary material for: Association of MicroRNA-196a2 Variant with Response to Short-Acting β2-Agonist in COPD: An Egyptian Pilot Study
Source: PubMed Central journal article supplement (PMC4820109; doi:10.1371/journal.pone.0152834), 2016-04-04
Supplement: pone.0152834.s003.pdf [file pone.0152834.s003.pdf]

**S3 Table. Genes involved in COPD pathogenesis pathways identified by Ingenuity pathway analysis software and in literature <sup>a</sup>**

| n=58                                     |          | n=18                        |  | n=21                     |  | n=25                    |  |
|------------------------------------------|----------|-----------------------------|--|--------------------------|--|-------------------------|--|
| COPD genes by Kaneko 2013 (IPA software) |          | COPD genes by Campbell 2012 |  | COPD genes by Ezzei 2012 |  | COPD genes by Chen 2008 |  |
| ABCC1                                    | INTS12   | ACVRL1                      |  | ACVR1                    |  | AKR1B1                  |  |
| ACE                                      | IREB2    | BCL11A                      |  | AGBL1                    |  | AKR1B10                 |  |
| ADAM19                                   | LEP      | BMPR2                       |  | BMP7                     |  | CDC2L1                  |  |
| ADAM33                                   | MACROD2  | ENG                         |  | E2F4                     |  | CDKN1A                  |  |
| ADRB2                                    | MMP1     | EPAS1 (HIF-2a)              |  | GDF10                    |  | clCAM-1                 |  |
| AGER                                     | MMP12    | GATA2                       |  | INHBB                    |  | COL1A1                  |  |
| BICD1                                    | MMP9     | ITGB1                       |  | LTBP1                    |  | CP                      |  |
| CHRNA3                                   | MSR1     | KLF13                       |  | MAF                      |  | CTGF                    |  |
| CHRNA5                                   | NFKBIB   | SMAD1                       |  | MYH11                    |  | CX3CL1                  |  |
| CNTN5                                    | NOS3     | SMAD2                       |  | PLN                      |  | CXCL8                   |  |
| CSF2                                     | NPNT     | SMAD3                       |  | PPP1R3C                  |  | CXCR1                   |  |
| CTLA4                                    | PDE4D    | SMAD6                       |  | ROCK1                    |  | CXCR2                   |  |
| CYP2A6                                   | PPT2     | SMAD7                       |  | SAPS1                    |  | CXCR3                   |  |
| DBP                                      | SERPINA1 | TAL1                        |  | SFTPA1B                  |  | CXCR8                   |  |
| EDN1                                     | SERPINE2 | TBX3                        |  | SLIT2                    |  | CYP1B1                  |  |
| EPHX1                                    | SFTPB    | TGFB                        |  | SMAD7                    |  | CYR61                   |  |
| ESR1                                     | SFTPD    | TGFBR1                      |  | SMURF1                   |  | ERG                     |  |
| FAM13A                                   | SIRT2    | TGFBR2                      |  | SOSTDC1                  |  | IGFBP5                  |  |
| FGF7                                     | SOD3     |                             |  | TGFBR1                   |  | LUM                     |  |
| GC                                       | STAT1    |                             |  | TGFBR2                   |  | MGC11242                |  |
| GSTCD                                    | TGFB1    |                             |  | THBS1                    |  | MMP7                    |  |
| GSTM1                                    | THSD4    |                             |  |                          |  | PDGFRA                  |  |
| GSTO2                                    | TLR4     |                             |  |                          |  | SOD2                    |  |
| GSTP1                                    | TNFA     |                             |  |                          |  | TGFB1                   |  |
| HHIP                                     | TNS1     |                             |  |                          |  | TGFBR3                  |  |
| HMOX1                                    | TP53     |                             |  |                          |  |                         |  |
| HTR4                                     | TRPV4    |                             |  |                          |  |                         |  |
| IL13                                     | XRCC1    |                             |  |                          |  |                         |  |
| IL1B                                     |          |                             |  |                          |  |                         |  |
| IL6                                      |          |                             |  |                          |  |                         |  |

<sup>a</sup> Yellow shaded cells are miR-196a2 target genes.
