# Supplementary material for: Association of MicroRNA-196a2 Variant with Response to Short-Acting β2-Agonist in COPD: An Egyptian Pilot Study
Source: PubMed Central journal article supplement (PMC4820109; doi:10.1371/journal.pone.0152834), 2016-04-04
Supplement: pone.0152834.s004.pdf [file pone.0152834.s004.pdf]

**S4 Table. Predicted target genes of microRNA-196a2 using DIANA-miRPath v2.0 web-server (<http://diana.imis.athena-innovation.gr/DianaTools/index.php?r=mirpath/index>) and miRTar Human tool (<http://miRTar .mbc.nctu.edu.tw/>)" that have a putative role in COPD disease**

| Gene ID         | Gene title                                                       | Gene symbol | Function and signaling pathway                                                                                 |
|-----------------|------------------------------------------------------------------|-------------|----------------------------------------------------------------------------------------------------------------|
| ENSG00000159640 | angiotensin 1 converting enzyme                                  | ACE         | Cell-to-cell signaling and interaction, hematological system development and function, immune cell trafficking |
| ENSG00000114739 | activin A receptor type IIB                                      | ACVR2B      | Cytokine-cytokine receptor interaction, TGF-beta signaling                                                     |
| ENSG00000000861 | B-cell CLL/lymphoma 11A                                          | BCL11A      | Transcription regulation                                                                                       |
| ENSG00000147044 | calcium/calmodulin-dependent serine protein                      | CASK        | Cell junction and communication                                                                                |
| ENSG00000108821 | collagen type 1 alpha 1                                          | COL1A1      | ECM-receptor interaction, connective tissues and cartilage formation                                           |
| ENSG00000164692 | collagen type 1 alpha 2                                          | COL1A2      | Cell junction and communication, ECM-receptor interaction                                                      |
| ENSG00000168542 | collagen type 3 alpha 1                                          | COL3A1      | Cell junction and communication, focal adhesion, ECM-receptor interaction                                      |
| ENSG00000147202 | diaphanous homolog 2                                             | DIAPH2      | Regulation of actin cytoskeleton                                                                               |
| ENSG00000079819 | erythrocyte membrane protein band 4.1-like 2                     | EPB41L2     | Cell junction and communication, regulation of actin cytoskeleton                                              |
| ENSG00000157554 | erythroblast transformation- specific                            | ERG         | Transcription regulation                                                                                       |
| ENSG00000136068 | Filamin B, beta (actin binding protein 278)                      | FLNB        | MAPK signaling pathway, focal adhesions, regulation of actin cytoskeleton                                      |
| ENSG00000084207 | glutathione S-transferase pi 1                                   | GSTP1       | Aryl hydrocarbon receptor signaling: Inflammatory disease, respiratory disease, cellular movement              |
| ENSG00000106004 | homeobox A5                                                      | HOXA5       | Lung development, transcription factor                                                                         |
| ENSG00000122592 | homeobox A7                                                      | HOXA7       | Lung development                                                                                               |
| ENSG00000108511 | homeobox B6                                                      | HOXB6       | Lung development                                                                                               |
| ENSG00000120068 | homeobox B8                                                      | HOXB8       | Lung development                                                                                               |
| ENSG00000037965 | homeobox C8                                                      | HOXC8       | Lung development                                                                                               |
| ENSG00000164270 | 5-hydroxytryptamine (serotonin) receptor 4                       | HTR4        | Neurological disease, nutritional disease, psychological disorders                                             |
| ENSG00000138448 | integrin alpha V                                                 | ITGAV       | Regulation of actin cytoskeleton, ECM-receptor interaction, signal transduction                                |
| ENSG00000150093 | integrin beta 1                                                  | ITGB1       | Regulation of actin cytoskeleton, ECM-receptor interaction, hemostasis, tissue repair, immune response         |
| ENSG00000107643 | mitogen-activated protein kinase                                 | MAPK8       | Focal adhesion, epithelial cell signaling, wnt signaling, Toll-like receptor signaling, apoptosis              |
| ENSG00000189409 | matrix metalloproteinases 23 B                                   | MMP23B      | mTOR signaling pathway, tissue remodeling                                                                      |
| ENSG00000122126 | oculocerebrorenal syndrome of Lowe                               | OCRL        | Regulation of actin cytoskeleton                                                                               |
| ENSG00000134853 | platelet-derived growth factor receptor alpha polypeptide        | PDGFRA      | Cell junction and communication, cytokine-cytokine receptor interaction, calcium signaling, MAPK signaling     |
| ENSG00000198523 | phospholamban                                                    | PLN         | Muscle contraction and action potential                                                                        |
| ENSG00000168452 | palmitoyl-protein thioesterase 2                                 | PPT2        | Cell death and survival, cell cycle, cellular movement                                                         |
| ENSG00000164327 | Rapamycin-insensitive companion of mammalian target of rapamycin | RICTOR      | mTOR signaling pathway, cell growth                                                                            |
| ENSG00000067900 | Rho-associated, coiled-coil containing protein kinase 1          | ROCK1       | Leukocyte trans-endothelial migration, regulation of actin cytoskeleton, Wnt signaling, TGF-beta signaling     |
| ENSG00000170365 | Human mothers against decapentaplegic homolog 1                  | SMAD1       | TGF-beta signaling, cell growth, apoptosis, morphogenesis, development and immune responses                    |
| ENSG00000137834 | Human mothers against decapentaplegic homolog 6                  | SMAD6       | TGF-beta/activin-signalling, BMP signaling                                                                     |
| ENSG00000163513 | transforming growth factor beta receptor 2                       | TGFBR2      | TGF-beta signaling, cell proliferation, differentiation and death                                              |
| ENSG00000069702 | transforming growth factor beta receptor 3                       | TGFBR3      | TGF-beta signaling, tissue fibrosis                                                                            |
| ENSG00000187720 | thrombospondin, type I, domain containing 4                      | THSD4       | Cell death and survival, cell cycle, cellular movement, microfibril assembly                                   |
