# Supplementary material for: Association of MicroRNA-196a2 Variant with Response to Short-Acting β2-Agonist in COPD: An Egyptian Pilot Study
Source: PubMed Central journal article supplement (PMC4820109; doi:10.1371/journal.pone.0152834), 2016-04-04

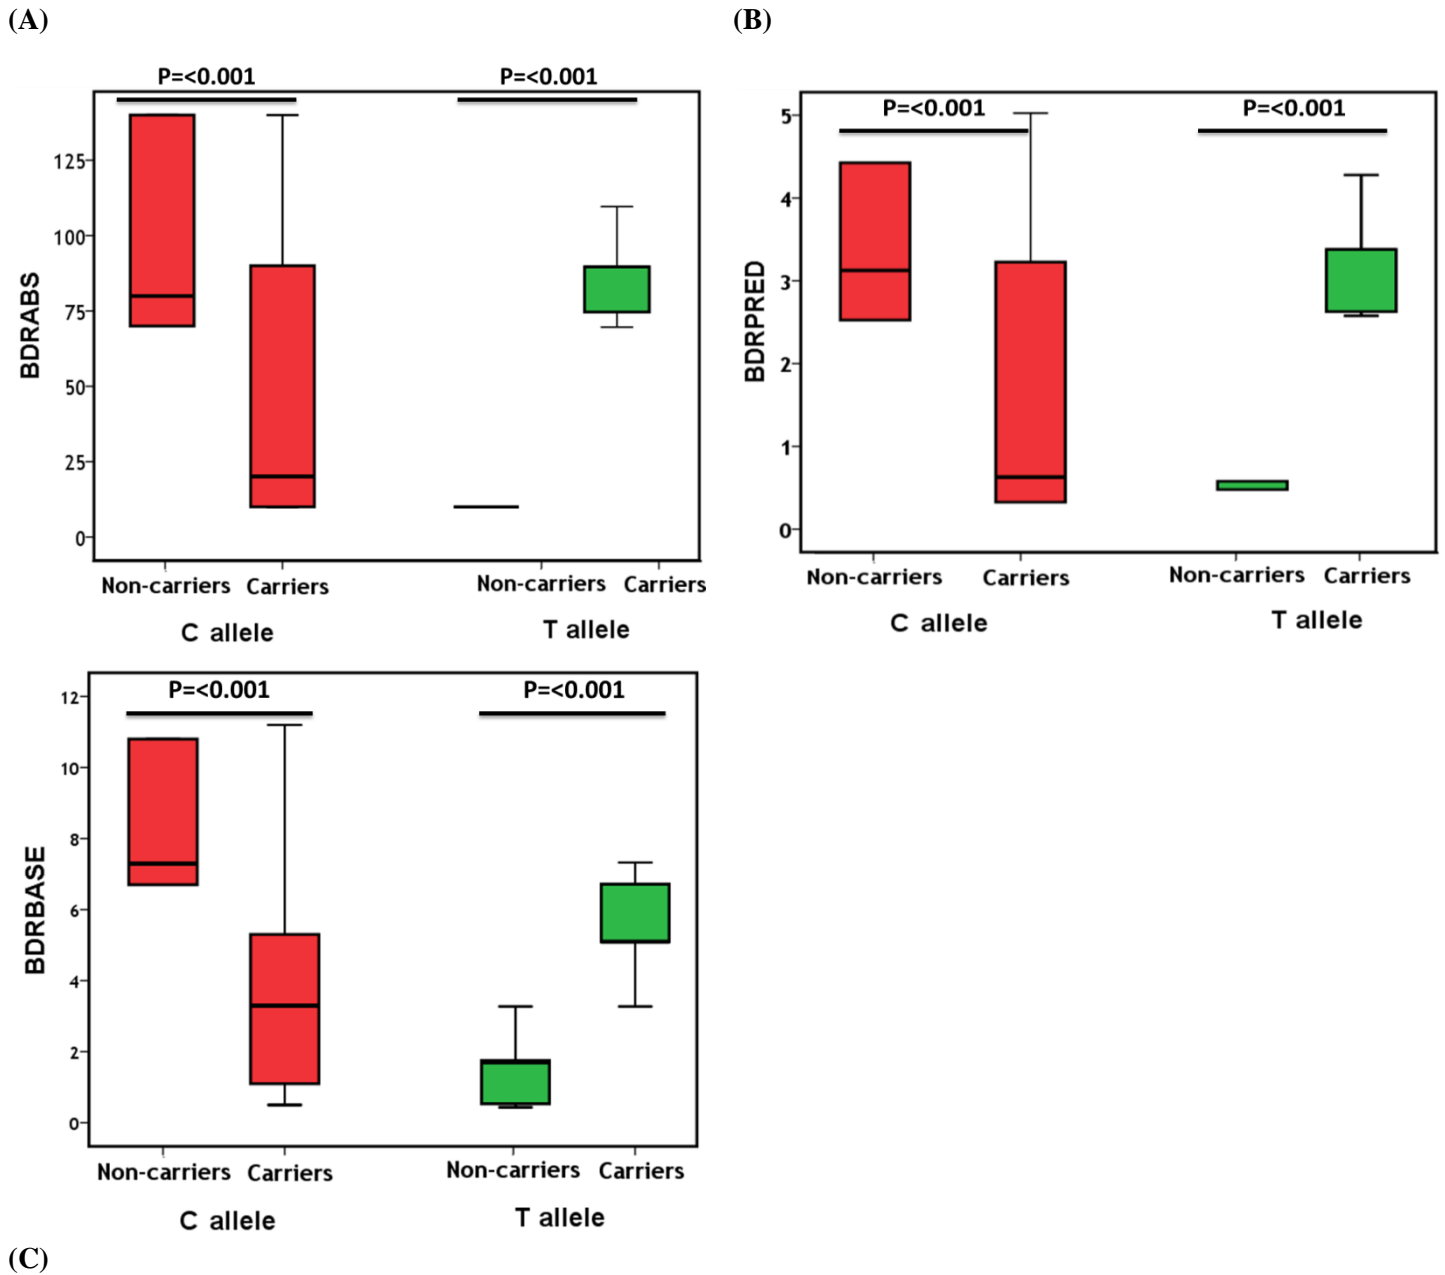

**S1 Fig. Bronchodilator response, according to *hsa-miR-196a2* alleles in COPD patients.** Data are represented as medians. The box defines upper and lower quartiles (25% and 75%, respectively) and the error bars indicate upper and lower adjacent limits. Mann-Whitney test was used. BDRABS absolute change in forced expiratory volume in the first second (FEV1), BDRPRED change in FEV1 as a percent of predicted FEV1, BDRBASE change in FEV1 as a percent of baseline FEV1, all calculations have been explained in detail in the text.

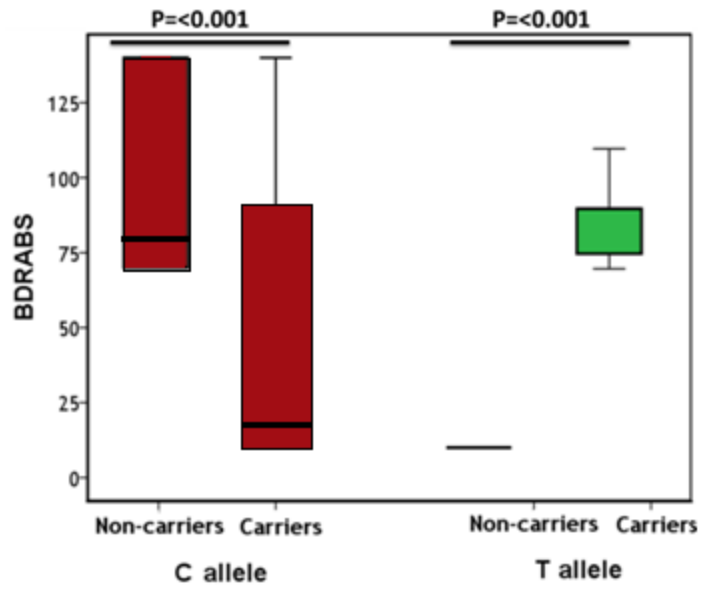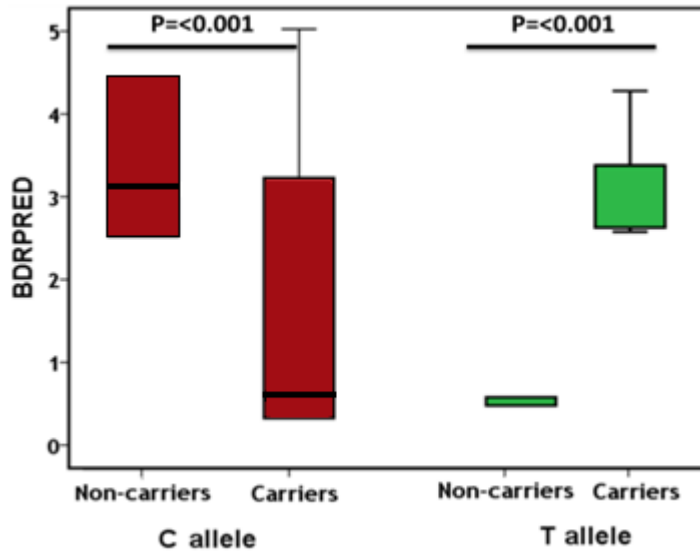

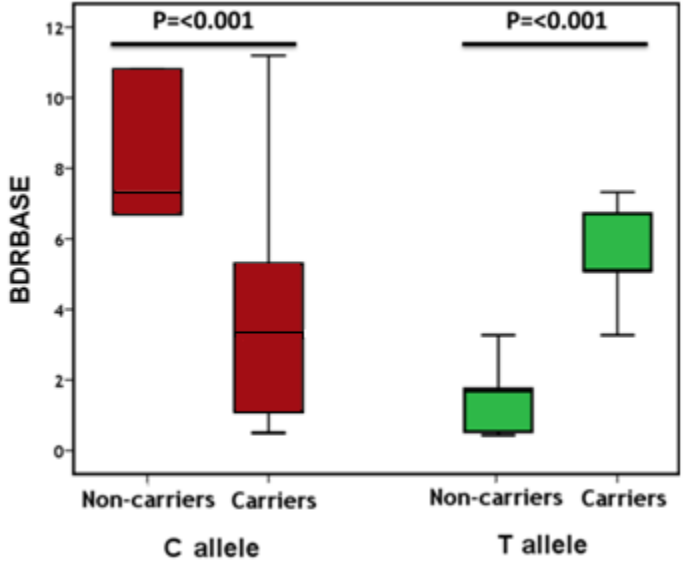

Supplement: pone.0152834.s006.pdf [file pone.0152834.s006.pdf]
